# Supplementary material
Source: publisher figshare collection journal article supplement (https://sage.figshare.com/ndownloader/files/17662331)
Supplement: Supplementary file 1 [file 17662331]

**Appendix B**

**Table B1.** A summary of the solar radiation zones in China.

| Solar zone (Source ([Lau et al., 2007](#_ENREF_2))) | Stations | Number | Annual average clearness index |
| --- | --- | --- | --- |
| I | Dunhuang, Ejinqi, Erlianhaote, Gangcha, Gar, Golmud, Hami, Lhasa | 8 | 0.65 |
| II | Aksu, Altay, Changdu, Datong, Dongsheng, Ejinhoroqi, Fuyu, Ganzi, Guoluo, Guyuan, Hailar, Hailiutu, Heihe, Hetian, Hohhot, Hongyuan, Jiuquan, Kashi, Kuqa, Lijiang, Minqin, Mohe, Naqu, Qitai, Ruoqiang, Suolun, Tacheng, Turpan, Urumqi, Xilinhot, Xining, Xisha, Yanqi, Yinchuan, Yining, Yushu | 36 | 0.57 |
| III | Anyang, Beijing, Changchun, Chaoyang, Dalian, Emeishan, Fengcheng, Gushi, Harbin, Houma, Jiamusi, Jinan, Jinghong, Jining, Juxian, Lanzhou, Leting, Luohe, Lvsi, Kunming, Mengzi, Panzhihua, Qingjiang, Sanya, Shenyang, Taiyuan, Tengchong, Tianjin, Tianshui, Tongliao, Tumdzuoqi, Weining, Yan’an, Yanji, Yantai, Yantai (Fushan), Zhaotong, Zhengzhou | 38 | 0.48 |
| IV | Ankang, Beihai, Changning, Changsha, Changsha, Cixi, Fuzhou, Ganzhou, Guangzhou, Guilin, Haikou, Hangzhou, Hefei, Hongjia, Hong Kong, Jian’ou,  Lushan, Nanchang, Nanjing, Nanning, Nanyang, Shanghai, Shanghai, Shantou, Shaoguan, Tunxi, Wuhan, Xi’an, Yichang, Zhongshan | 30 | 0.39 |
| V | Chengdu, Chongqing, Chongqing, Guiyang, Jishou, Leshan, Luzhou, Mianyang, Nanchong, Wanxian, Zunyi | 11 | 0.30 |
| Solar zone (Source ([Cao et al., 2017](#_ENREF_1))) | Distribution | Annual average clearness index | Daily average solar radiation (MJ/ m2 day) |
| I | Across the west Qingzang Plateau into the Inner Mongolia Plateau | >0.67 | >20 |
| IIA (Basin) | The Tarim and Tulufan Basins | 0.57-0.67 | 16-20 |
| IIB (Plateau) | From the south Qingzang Plateau, over the Loess Plateau and the Inner,to the Da Xing Gan Mountains |
| IIIA (Plain) | Dongbei and Huabei Plains | 0.48-0.57 | 14-16 |
| IIIB (Plateau) | Yungui Plateau |
| IV (Plain) | In the southeast including the Huazhong and Huanan Plains along the seashore of the East and South China Sea | 0.39-0.48 | 12-14 |
| V (Basin) | In the center of the Sichuan Basin surrounded by the Qingzang Plateau to the west and the Yungui Plateau to the south, the Wushan Mountains to the east and the Daba Mountains to the north | 0.39 | <12 |
| Solar zone (Source ([Liu et al., 2017](#_ENREF_3))) | Stations | Number | Daily average solar radiation (MJ/ m2 day) |
| I | Gangcha, Golmud, Gar, Naqu, Lhasa, Yushu, Guoluo, Chamdo, Ganzi, Hongyuan, Lijiang, Panzhihua, Tengchong, Kunming, Jinghong, Mengzi, Sanya | 17 | 17.02 |
| II | Solon, Alaty, Tacheng, Yining, Urumqi, Yanqi, Turpan, Aksu, Kashi, Ruoqiang, Hetan, Hami, Ejinaqi, Dunhuang, Jiuquan, Minqin, Xining, Erenhot, Hailiutu, Datong, Dongsheng, Yinchuan, Guyuan, Xilinhot | 24 | 15.86 |
| III | Mohe, Heihe, Hailar, Fuyu, Jiamusi, Harbin, Lanzhou, Yuzhong, Taiyuan, Yan’an, Xifeng, Houma, Tongliao, Changchun, Yanji, Chaoyang, Shenyang, Tianjin, Beijin, Laoting, Dalian, Fushan, Jinan, Juxian, Zhengzhou, Jinghe | 26 | 13.58 |
| IV | Nanyang, Wuhan, Ganzhou, Huai’an, Gushi, Nanjing, Lvsi, Hefei, Shanghai, Hangzhou, Tunxi, Nanchang, Hongjia, Jian’ou, Fuzhou, Guangzhou, Shantou, Nanning, Beihai, Haikou | 20 | 12.79 |
| V | Chengdu, Mianyang, Ankang, Yichang, Shapingba, Naxi, Jishou, Changsha, Guiyang, Changning, Guilin | 11 | 10.33 |
